# Supplementary material for: Injectable and Antioxidative HT/QGA Hydrogel for Potential Application in Wound Healing
Source: MDPI journal article supplement (doi:10.3390/gels7040204), 2021-11-09
Supplement: s1 [file s1]

Article

# Injectable and Antioxidative HT/QGA Hydrogel for Potential Application in Wound Healing

Yikun Ren <sup>†</sup>, Dan Zhang <sup>†</sup>, Yuanmeng He, Rong Chang, Shen Guo, Shanshan Ma, Minghao Yao <sup>\*</sup> and Fangxia Guan <sup>\*</sup>

The supplementary data

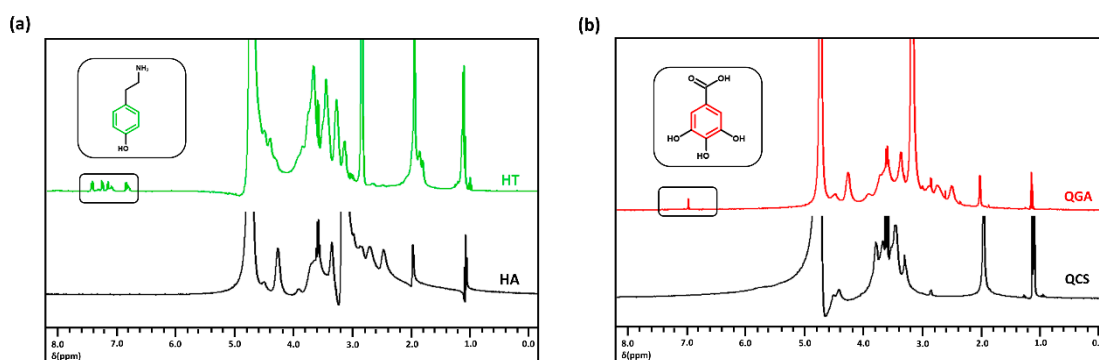

**Figure S1.** (a) <sup>1</sup>H NMR spectra of HA and HT conjugate; (b) <sup>1</sup>H NMR spectra of QCS and QGA conjugate.
